# Supplementary material for: Online parent-targeted cognitive-behavioural therapy intervention to improve quality of life in families of young cancer survivors: study protocol for a randomised controlled trial
Source: Springer Nature journal article supplement (doi:10.1186/s13063-015-0681-6), 2015-04-11
Supplement: MOESM1 [file 9781994]

Hunter New England Human Research Ethics Committee  
(Under the Australian National Mutual Acceptance Scheme)

HREC/14/HNE/44

Women's and Children's  
Hospital, Adelaide

Women's and Children's  
Hospital Network

SSA/14/WCHN/60

Royal Children's Hospital,  
Brisbane

Children's Health  
Queensland Hospital and  
Health Service

SSA/14/QRCH/95

The Children's Hospital at  
Westmead

The Sydney Children's  
Hospital Network

SSA/14/SCHN/219

The Sydney Children's  
Hospital

The Sydney Children's  
Hospital Network

SSA/14/SCHN/156
